# Supplementary material for: Controlled ionic conductivity via tapered block polymer electrolytes
Source: Royal Society of Chemistry journal article supplement (doi:10.1039/c4ra15953e), 2015-01-01
Supplement: c4ra15953e1.pdf [file c4ra15953e1.pdf]

*Electronic supplementary information for*

**Controlled Ionic Conductivity via Tapered Block Polymer Electrolytes**

Wei-Fan Kuan<sup>a</sup>, Roddel Remy<sup>b</sup>, Michael E. Mackay<sup>a,b</sup>, Thomas H. Epps, III<sup>a,b,\*</sup>

<sup>a</sup> Department of Chemical and Biomolecular Engineering, University of Delaware, Newark, DE 19716

<sup>b</sup> Department of Materials Science and Engineering, University of Delaware, Newark, DE 19716

\*Corresponding author. Email: thepps@udel.edu

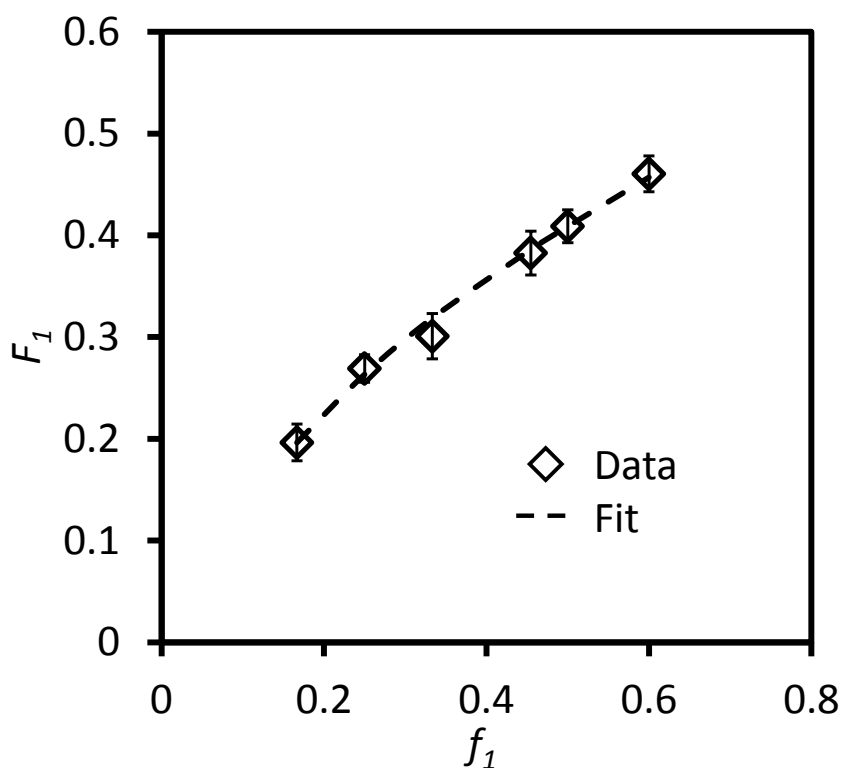

**Fig. S1** Reactivity ratio data for styrene ( $M_1$ ) and *oligo*-oxyethylene methacrylate ( $M_2$ ) monomers from atom transfer radical polymerization (ATRP) at 90 °C in anisole and fit using the nonlinear Mayo–Lewis equation,  $F_1 = (r_1 f_1^2 + f_1 f_2) / (r_1 f_1^2 + 2 f_1 f_2 + r_2 f_2^2)$ .  $f_1$  and  $f_2$  are the mole fractions of monomers ( $M_1$  and  $M_2$ ) in the feed;  $F_1$  and  $F_2$  are the mole fractions of  $M_1$  and  $M_2$  in the copolymers. The reactivity ratios from the data fit are  $r_1 = k_{11}/k_{12} = 0.13$  and  $r_2 = k_{22}/k_{21} = 0.64$ , for which  $k_{11}$ ,  $k_{12}$ ,  $k_{22}$ , and  $k_{21}$  are reaction rate coefficients. Error bars represent standard deviation in proton nuclear magnetic resonance ( $^1\text{H}$  NMR) data.

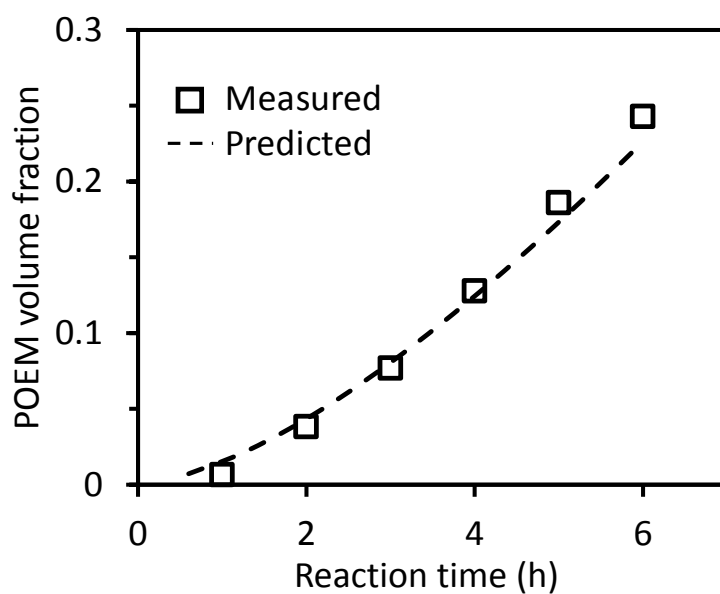

**Fig. S2** Predicted (dash line) and measured (square) data for the poly(*oligo*-oxyethylene methacrylate) (POEM) volume fraction change in the taper *versus* ATRP reaction time. POEM volume fraction was determined *via*  $^1\text{H}$  NMR. The reported data are from the synthesis of the normal-tapered  $\text{P}(\text{S-SOEM-OEM})_{0.32}$  block polymer.

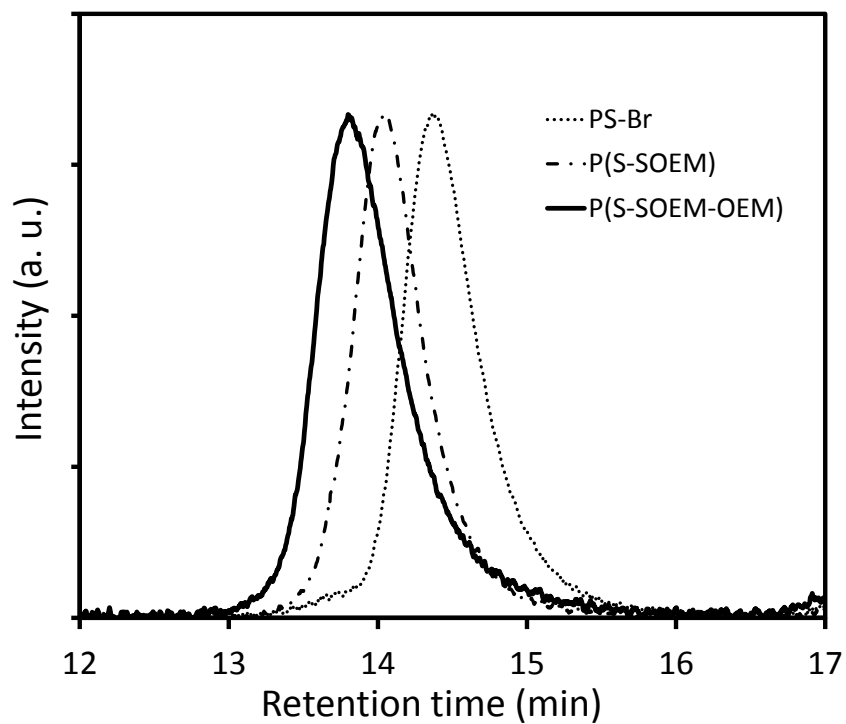

**Fig. S3** Representative gel permeation chromatography (GPC) data for the PS-Br macroinitiator, P(S-SOEM) tapered polymer, and P(S-SOEM-OEM) tapered block polymer. The reported data are from the synthesis of P(S-SOEM-OEM)<sub>0.32</sub>. The GPC flow rate was 1 mL/min.

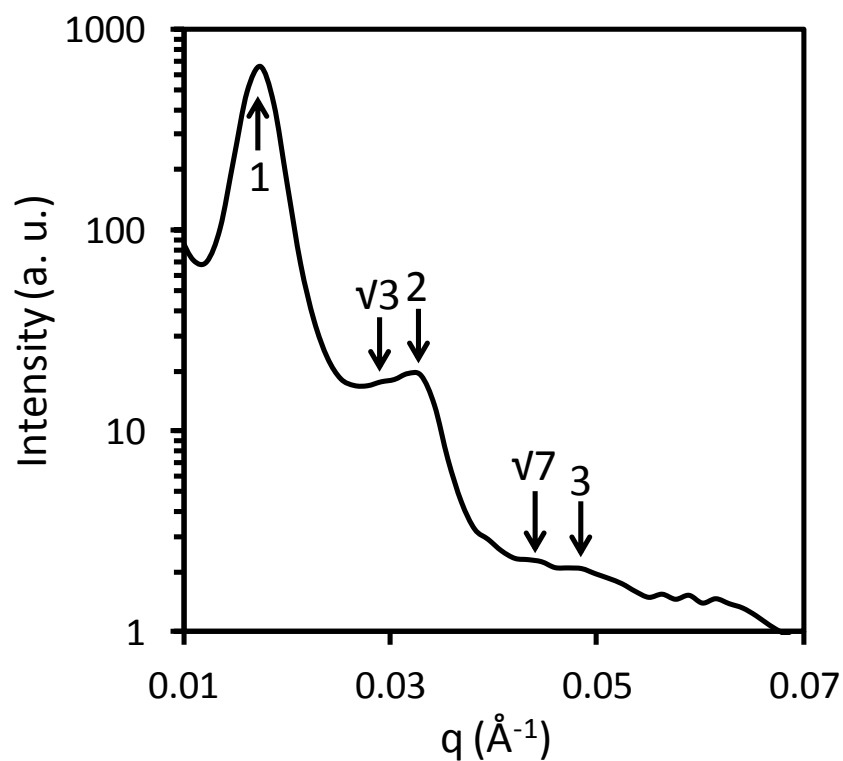

**Fig. S4** Azimuthally-integrated small angle X-ray scattering (SAXS) data for  $\text{LiCF}_3\text{SO}_3$ -doped poly (styrene-*b*-ethylene oxide) [P(S-EO)] at a salt-doping ratio of  $[\text{EO}]:[\text{Li}] = 15:1$ . Relative peak ratios are indicated by arrows. The domain spacing is 38.8 nm, and the peak ratios suggest a hexagonally-packed cylinder morphology. Data were collected on the lab source SAXS instrument at the University of Delaware.

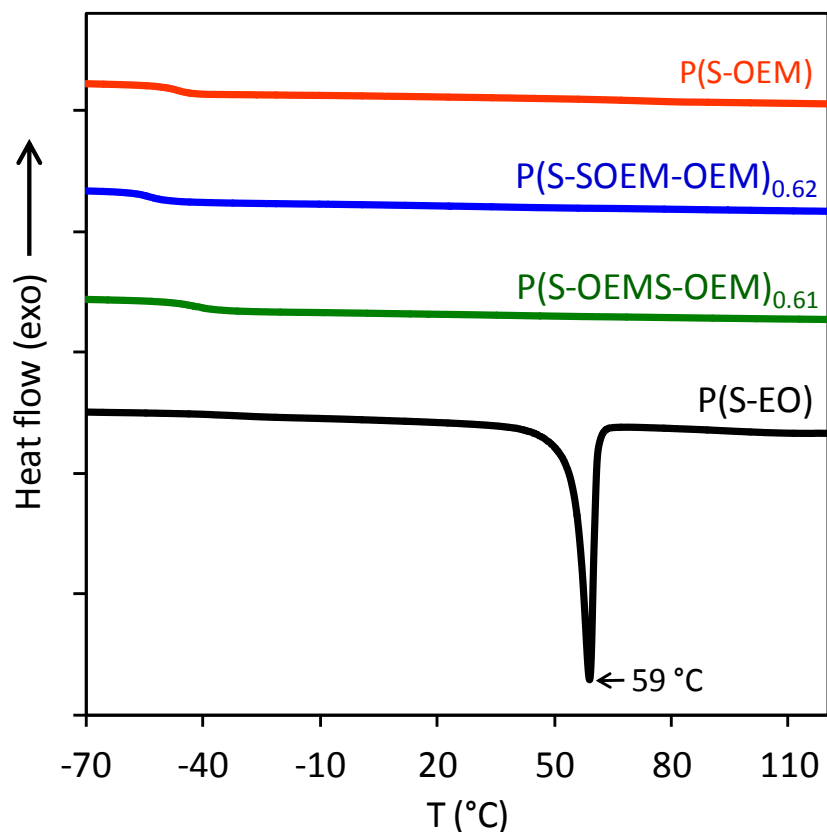

**Fig. S5** Third-heating differential scanning calorimetry (DSC) traces of  $\text{LiCF}_3\text{SO}_3$ -doped P(S-OEM), P(S-SOEM-OEM)<sub>0.62</sub>, P(S-OEMS-OEM)<sub>0.61</sub>, and P(S-EO) at [EO]:[Li]= 15:1. Melting peak of PEO is found only in the P(S-EO) sample, suggesting that POEM-based block polymers are amorphous over the entire experimental temperature range. The heating rate was 10  $^{\circ}\text{C}/\text{min}$  for all samples. The DSC traces were shifted vertically for clarity.

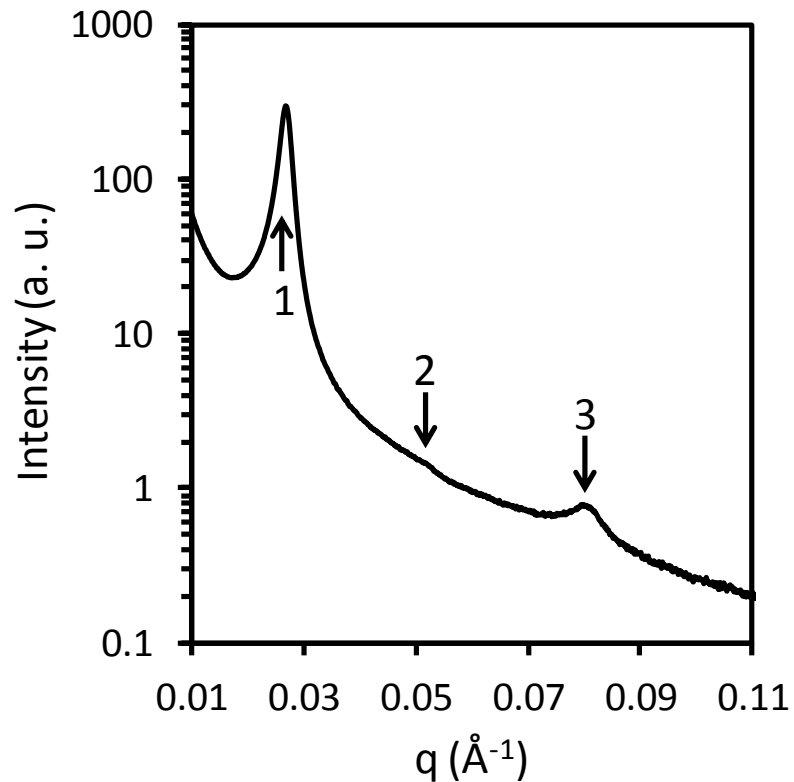

**Fig. S6** Azimuthally-integrated SAXS data for  $\text{LiCF}_3\text{SO}_3$ -doped  $\text{P}(\text{S-SOEM-OEM})_{0.32}$  at a salt-doping ratio of  $[\text{EO}]:[\text{Li}] = 15:1$ . Relative peak ratios are indicated by arrows. The domain spacing is 23.6 nm, and the peak ratios suggest a lamellar morphology. Data were collected on the DND-CAT 5-ID-D beamline at the Advanced Photon Source of Argonne National Laboratory.
